# Supplementary material for: Novel carbon dots/BiOBr nanocomposites with enhanced UV and visible light driven photocatalytic activity
Source: Royal Society of Chemistry journal article supplement (doi:10.1039/c5ra02613j), 2015-01-01
Supplement: c5ra02613j1.pdf [file c5ra02613j1.pdf]

## Supporting information

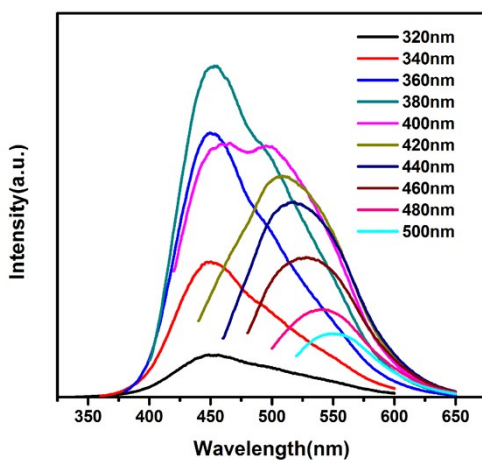

Fig. S1 PL spectra of CDs solution.

Fig. S1 displays the photoluminescence (PL) of the as-prepared CDs under different excitation wavelengths. The PL peak has correspondingly red shift with the change of excitation wavelengths from 320 to 500nm.

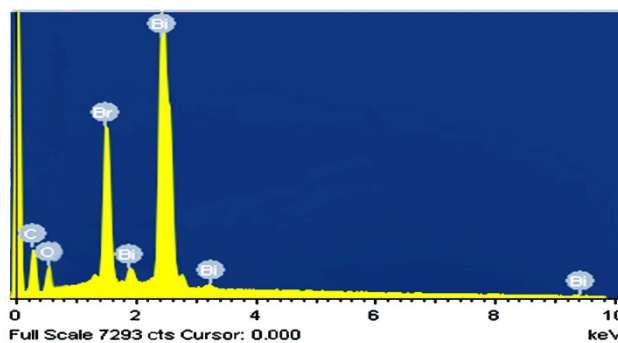

Fig. S2 EDS of the 2mL-CDs/BiOBr sphere-like structures.

The EDS spectrum shown in Fig. S2 displays peaks associated with Bi, O, Br and C, and the element content (mass %) was about 67.9, 5.64, 23.8 and 2.66, respectively.

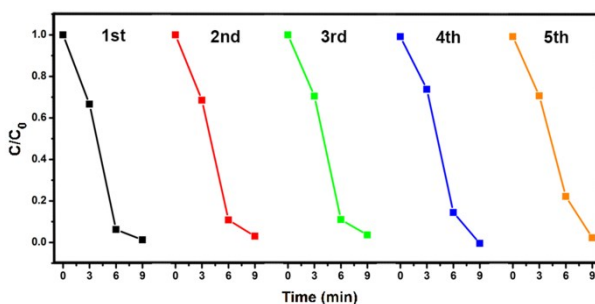

Fig. S3 Recycling tests of 2mL-CDs/BiOBr under UV irradiation.

The photocatalytic activity for BiOBr/CDs (2) under UV irradiation was studied in consecutive five cycles, and the results illustrated the relative stability of the photocatalyst.
